# Supplementary material for: Neuronal progenitors of the dentate gyrus express the SARS-CoV-2 cell receptor during migration in the developing human hippocampus
Source: Springer Nature journal article supplement (doi:10.1007/s00018-023-04787-8), 2023-05-07

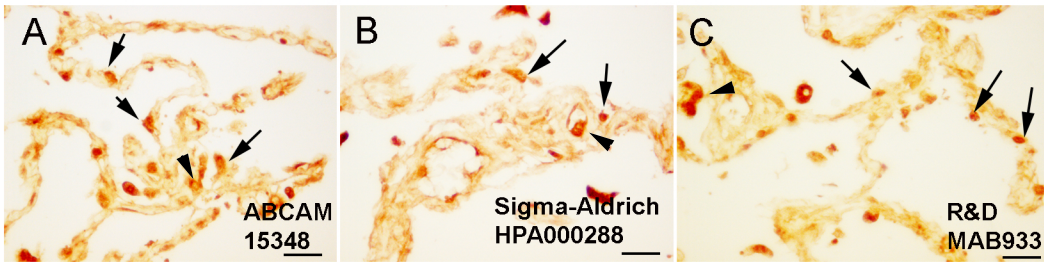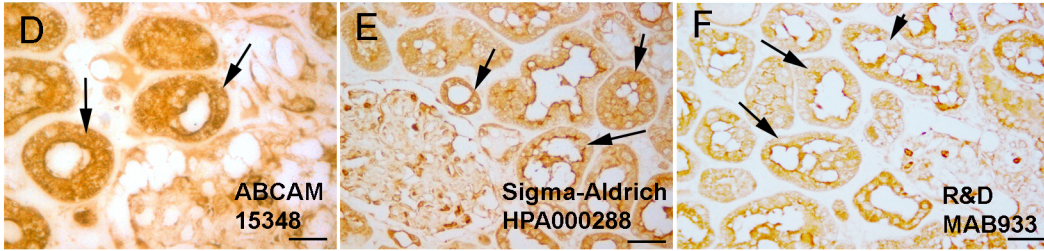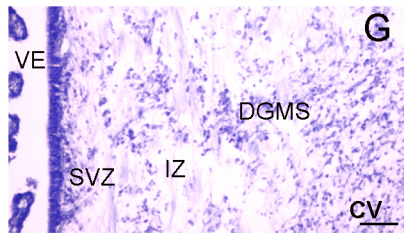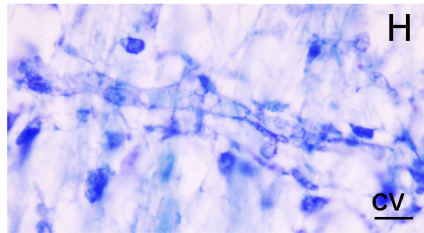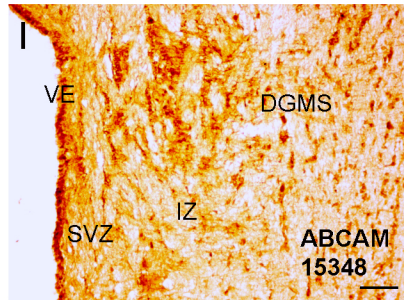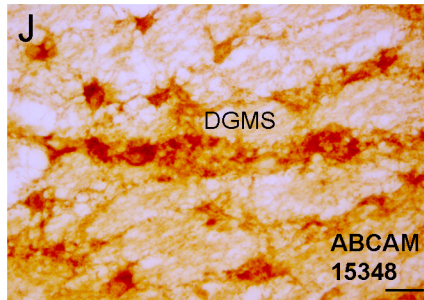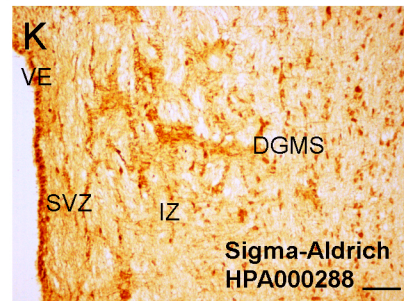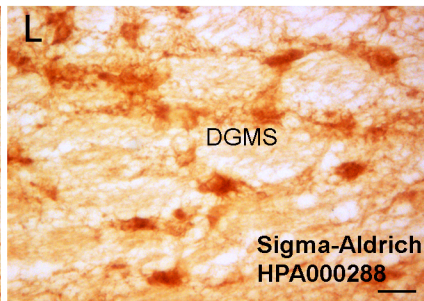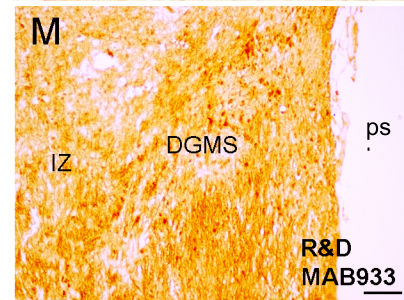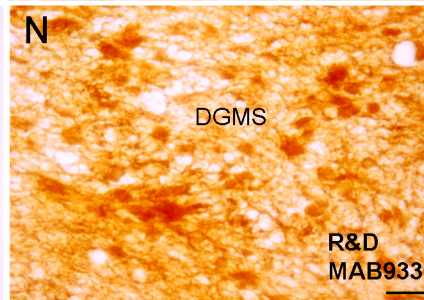

Supplement: MOESM2 [file 18_2023_4787_MOESM2_ESM.pdf]
